# Supplementary material
Source: MDPI journal article supplement (https://www.mdpi.com/2311-5637/9/10/906)
Supplement: s1 [file s1]

## Supplementary information

High-titer bioethanol production from steam exploded corn stover by an engineering *Saccharomyces cerevisiae* strain with high inhibitors tolerance

Yilu Wu <sup>1</sup>, Changsheng Su <sup>1</sup>, Honggang Zhang <sup>2</sup>, Gege Zhang <sup>3</sup>, Zicheng Liao <sup>4</sup>, Jieyi Wen <sup>1</sup>, Yankun Wang <sup>1</sup>, Yongjie Jiang <sup>1</sup>, Changwei Zhang <sup>1,\*</sup>, Di Cai <sup>1,\*</sup>

<sup>1</sup> National Energy R&D Center for Biorefinery, Beijing University of Chemical Technology, Beijing, 100029, PR China

<sup>2</sup> SDIC Bioenergy (Hailun) Co., Ltd, Suihua, Heilongjiang, 152300, PR China

<sup>3</sup> School of International Education, Beijing University of Chemical Technology, Beijing, 100029, PR China

<sup>4</sup> College of Life Science and Technology, Beijing University of Chemical Technology, Beijing, 100029, PR China

Corresponding authors

E-mail: zhangchangweibuct@163.com (C. Zhang); caidibuct@163.com (D. Cai)

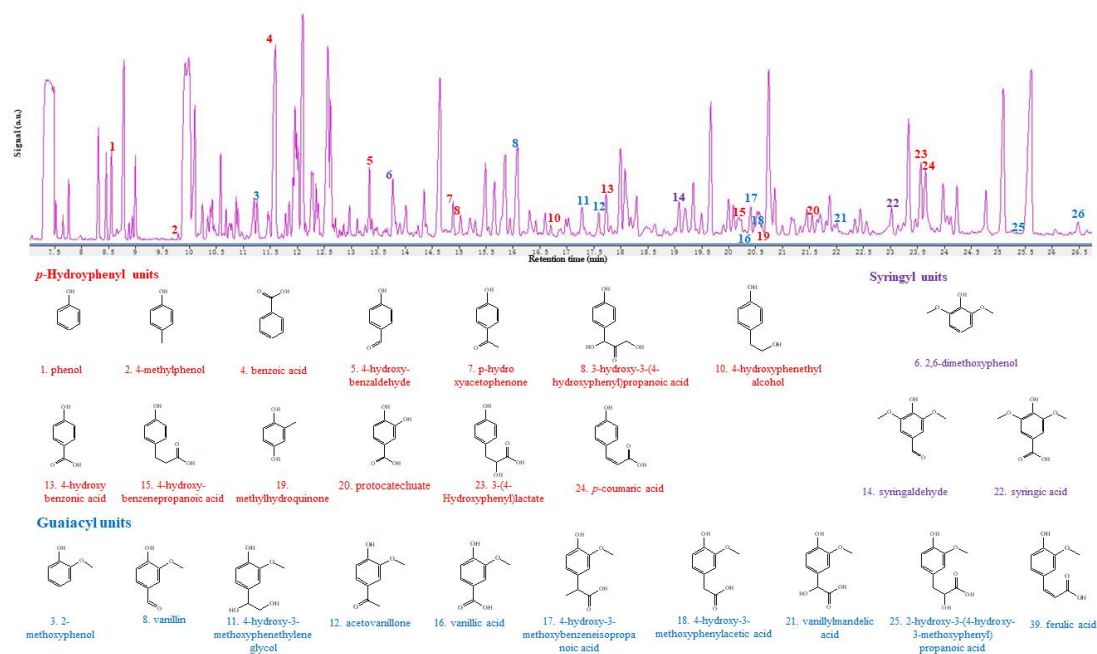

Figure S1. Lignin monomers presented in SECSH detected by GC/MS.

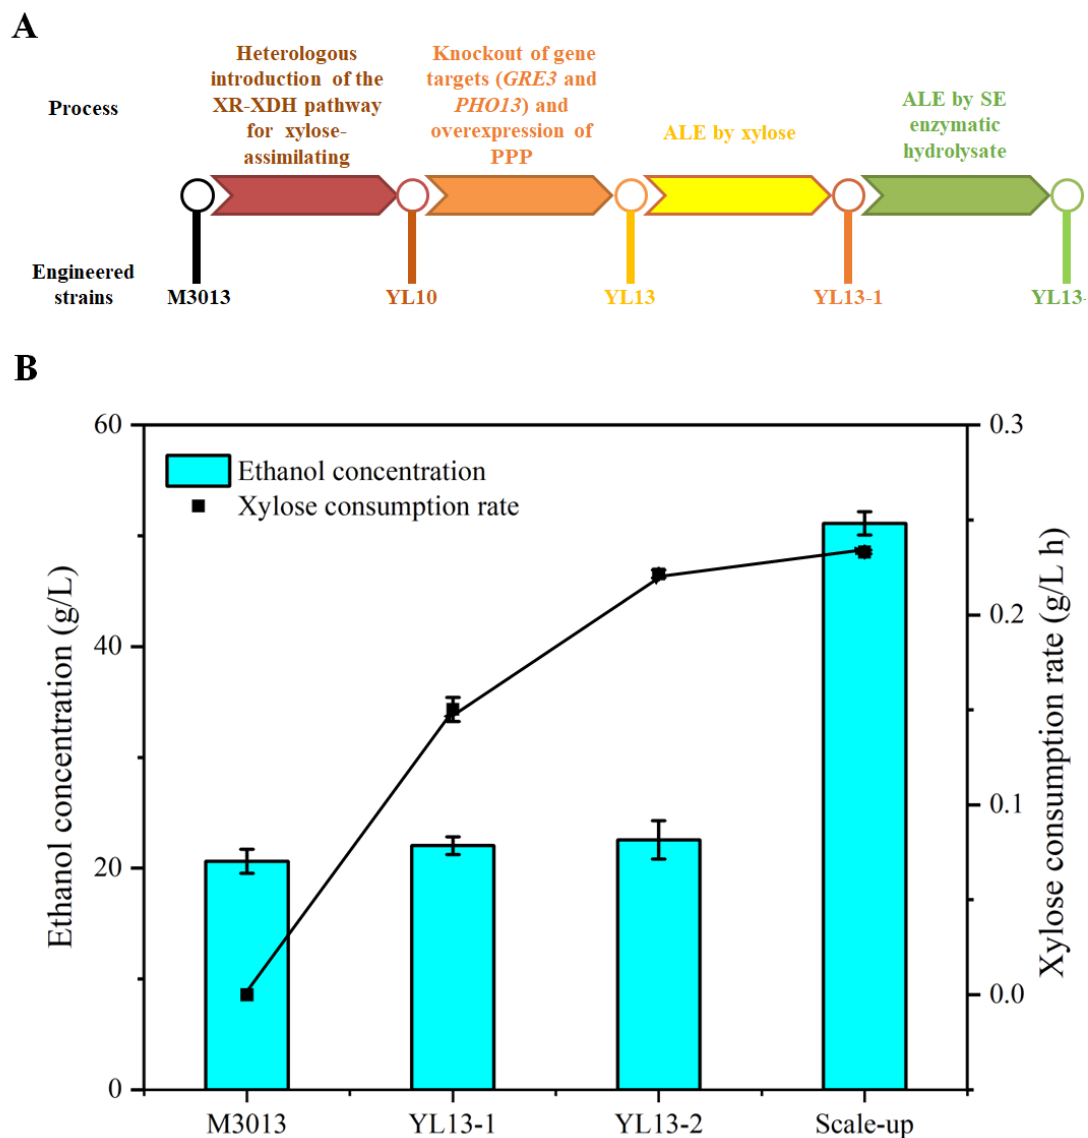

Figure S2. Construction and the evaluation of the genetic strain. (A) Flowchart of the construction process of *Saccharomyces cerevisiae* YL13-2. (B) Xylose consumption rate and ethanol concentration after batch fermentation of YL13-2 strain using the synthetic medium.

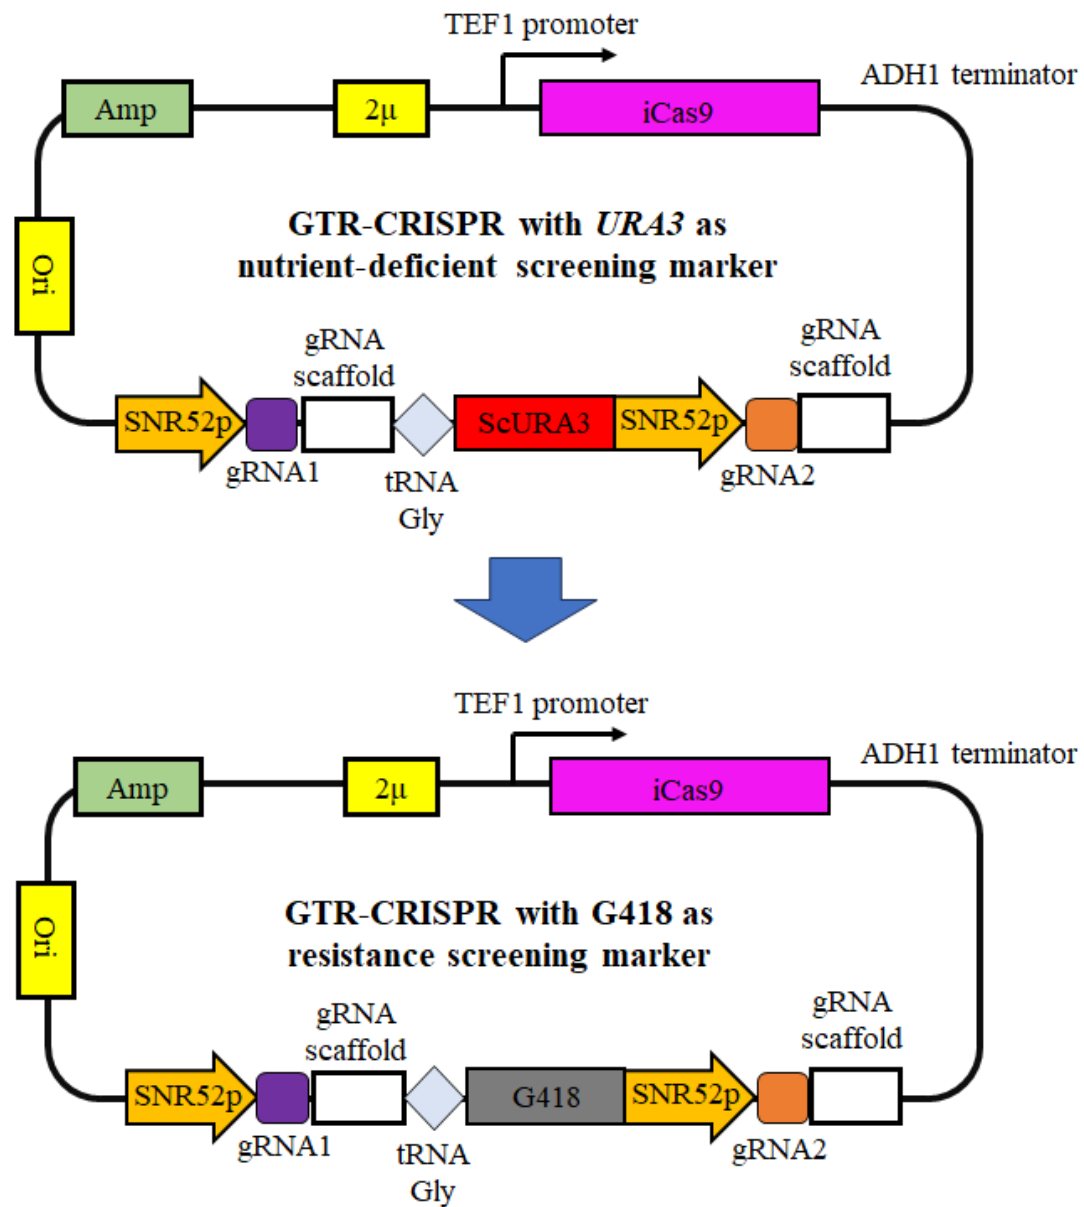

Figure S3. A gRNA-tRNA array for CRISPR-Cas9 (GTR-CRISPR). The screening marker replaced by *URA3* for *G418*.

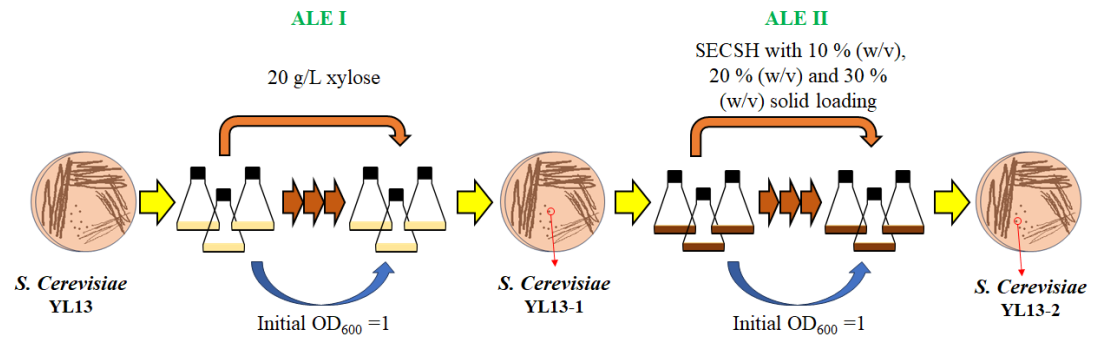

Figure S4. Schematic diagram of the xylose-assimilating enhancement and the inhibitors tolerance increases of *S. cerevisiae* YL 13 by the ALE strategy.

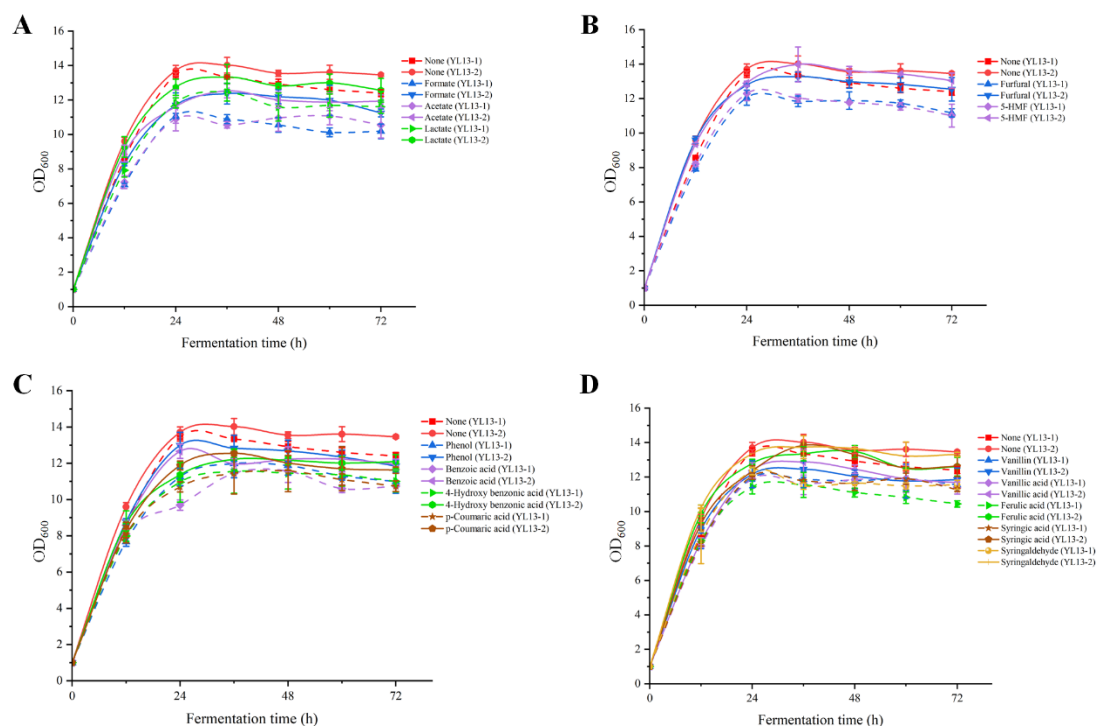

Figure S5. (A) Growth curves of *S. cerevisiae* YL13-1 and YL13-2 in synthetic medium containing organic acids that presence in SE enzymatic hydrolysate. (B) Growth curves of *S. cerevisiae* YL13-1 and YL13-2 in synthetic medium that containing furan derivatives (0.5 g/L of furfural and 5-HMF) presence in SE enzymatic hydrolysate. (C) (D) Growth curves of *S. cerevisiae* YL13-1 and YL13-2 in synthetic medium containing phenolic compounds (0.1 g/L of phenol, benzoic acid and 4-(hydroxymethyl)benzaldehyde, 0.04 g/L of *p*-coumaric acid, vanillin, vanillic acid, ferulic acid, syringic acid and syringaldehyde) presence in SE enzymatic hydrolysate.

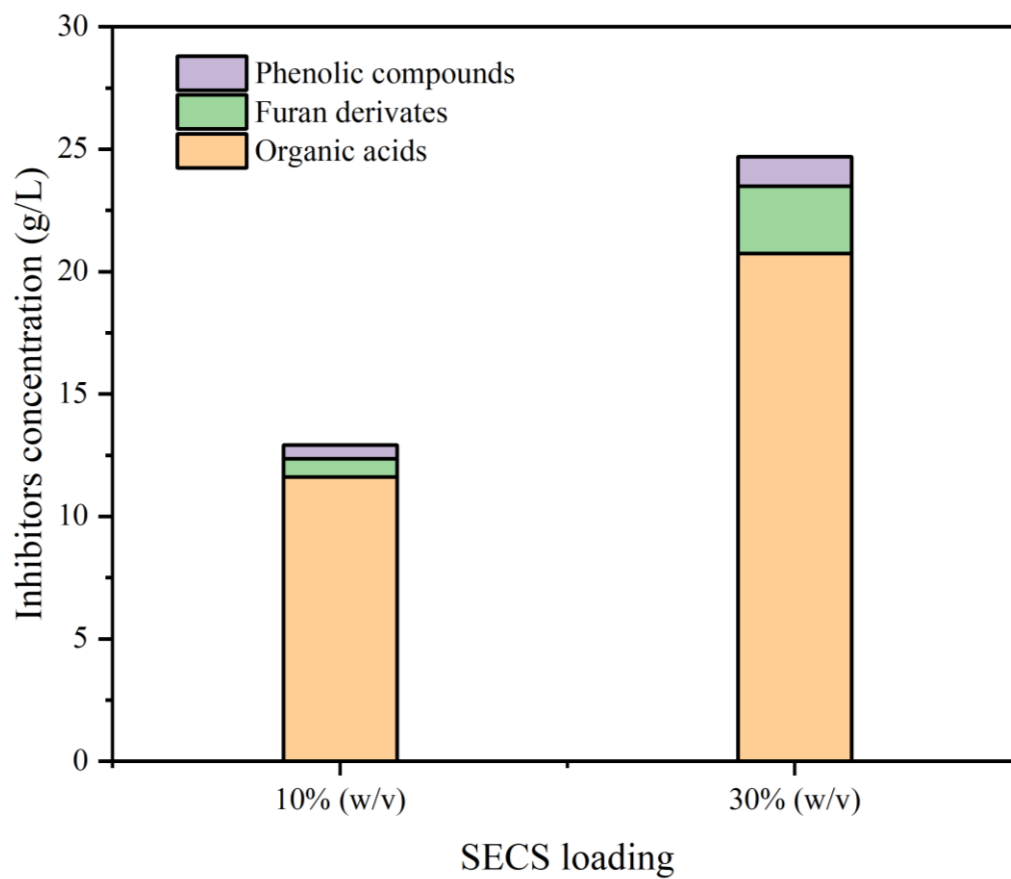

Figure S6. Inhibitors (organic acids, furan derivatives and phenolic compounds) concentration in 10 % (w/v) and 30 % (w/v) of SECS loading.

Table S1. Strains involved in this study.

| <b>Strain</b> | <b>Relevant Genotype and Manipulation</b>                                                                     |
|---------------|---------------------------------------------------------------------------------------------------------------|
| M3013         | Laboratory stored for bioethanol fermentation.                                                                |
| YL10          | M3013 derivative, XI-3:: <i>TEF2p-XYL1-TPI1t-TEF1p-mXYL1-PGII1t-PGK1p-XYL2-CYC1t-HXT7p-XKS1-HXT7t</i>         |
| YL11          | YL10 derivative, <b><i>PHO13</i></b> ::gRNA                                                                   |
| YL12          | YL11 derivative, <b><i>GRE3</i></b> ::gRNA                                                                    |
| YL13          | YL12 derivative, XII-2:: <i>TDH1p-RPE1-PGII1t- PGK1p-TAL1-Hxt7t-TEF1p-RKII1-tCYC1-TDH3p-TKL1-GPDt</i>         |
| YL13-1        | Single-colony isolate from adaptive laboratory evolution in <b>xylose</b> ; based on YL13                     |
| YL13-2        | Single-colony isolate from adaptive laboratory evolution in <b>SE enzymatic hydrolysate</b> ; based on YL13-1 |



Table S2. Primers involved in this study.

| Primer No. | Name          | Nucleotide sequence (5' > 3')                                                               |
|------------|---------------|---------------------------------------------------------------------------------------------|
| P1         | Gi-TDH1p-F    | CTATAGGGCGAATTGGGTACCGAATAGGATATGCGACGAA<br>GACGC                                           |
| P2         | Gi-TDH1p-R    | GTTTGACCATATTTTGTGTTTGTGTGTAAATTTAGTGAAGTAC<br>TG                                           |
| P3         | Gi-RPE1-F     | CAAAACAAAATATGGTCAAACCAATTATAGCTCCCAG                                                       |
| P4         | Gi-RPE1-R     | CGACTCTAGACTAATCTAGCAAATCTCTAGAACGCAAT                                                      |
| P5         | Gi-PGI1t-F    | GCTAGATTAGTCTAGAGTCGACAACAAATCGCTCT                                                         |
| P6         | Gi-PGI1t-R    | GCTTATCGATACCGTCGACCTCGAGCATATGGGTATACTGG<br>AGGCTTCAT                                      |
| P7         | RPE1-I-F      | GCGCGTAACCACCACACC                                                                          |
| P8         | RPE1-I-R      | ACTCATTAGGCACCCAGGC                                                                         |
| P9         | Gi-PGK1p-F    | CGAGGTCGACGGTATCGATAAGCTTGGAAGTACCTTCAAA<br>GAATGGGGTC                                      |
| P10        | Gi-PGK1p-R    | GTTCAGACATTTGTTTATATTTGTTGTAAAAAGTAGATAAT<br>TACTTCCTTG                                     |
| P11        | Gi-TAL1-F     | ATATAAAACAAATGTCTGAACCAGCTCAAAAGAAACA                                                       |
| P12        | Gi-TAL1-R     | CAAAGAATTCTTAAGCGGTAACCTTCTTTTCAATCAAGTC                                                    |
| P13        | Gi-Hxt7t-F    | TACCGCTTAAGAATTCTTTGCGAACACTTTTATTAATTCATG                                                  |
| P14        | Gi-Hxt7t-R    | TGGATCCCCCGGGCTGCAGGAATTCATAACTGACTCATTAG<br>ACACTTTTGAAGC                                  |
| P15        | TAL1-I-F      | TGTGCACTAATAGTTTACGCTCG                                                                     |
| P16        | TAL1-I-R      | ACTCATTAGGCACCCAGGC                                                                         |
| P17        | Gi-pTEF1-F    | CAGTTATGAATTCCTGCAGCCCGGGCACACACCATAGCTT<br>CAAAATGTTTCT                                    |
| P18        | Gi-pTEF1-R    | CGGCAGCCATCTTAGATTAGATTGCTATGCTTTCTTTCTAAT<br>GAG                                           |
| P19        | Gi-RKII-F     | CTAATCTAAGATGGCTGCCGGTGTCCCA                                                                |
| P20        | Gi-RKII-R     | TAGAGCGGATTCACCTTTTCGGTAACTTCAACACTACCGTC                                                   |
| P21        | Gi-tCYC1-F    | CGAAAAGTGAATCCGCTCTAACCGAAAAGGA                                                             |
| P22        | Gi-tCYC1-R    | CGGTGGCGGCCGCTCTAGAAGTAGTCTTCGAGCGTCCCAA<br>AACC                                            |
| P23        | RKII-I-F      | CAGAAAGTTGAGTGGGACGGAGA                                                                     |
| P24        | RKII-I-R      | ACTCATTAGGCACCCAGGC                                                                         |
| P25        | Gi-TDH3p-F    | TCGAAGACTAGTTCTAGAGCGGCCGCTTTGTTTGTATGT<br>GTGTTTATTCGAAACTAAGT                             |
| P26        | Gi-TDH3p-R    | ATTGAGTCATAACAGTTTATTCTGGCATCCACT                                                           |
| P27        | Gi-TKL1-F     | ATAAACTGTTATGACTCAATTCAGTACATTGATAAGCT                                                      |
| P28        | Gi-TKL1-R     | GTAAATTCAGTTAGAAAGCTTTTTTCAAAGGAGAAATTAG<br>CTTG                                            |
| P29        | Gi-GPDt-F     | AGCTTTCTAAGTGAATTTACTTTAAATCTTGCAATTAAATAA<br>ATTTTCT                                       |
| P30        | Gi-GPDt-R     | AGGGAACAAAAGCTGGAGCTCGGAATCTGTGTATATTACT<br>GCATCTAGATATATGT                                |
| P31        | TKL1-I-F      | GGTAATTCTGACGGTAGTGTTGAAGTTAC                                                               |
| P32        | TKL1-I-R      | ACTCATTAGGCACCCAGGC                                                                         |
| P33        | Donor-4xyxk-F | AGTAGAAATGCAGAGTGTGCTATATGTCCAATCTCGGTTTT<br>GTAGTTTGGCATATGCTATATAACAGTTGAAATTTGGATA       |
| P34        | Donor-4xyxk-R | GATGGTTAGATGGCTGAATAAAAACGTTAATTAAAGGAAT<br>ACAGAAGAGGACGCACAGATATATAACATCTGCATAATAG<br>GCA |
| P35        | Donor-RPE1-   | GGATGTGATTGAACCATTTATTGATAATATCAAGGCTTTGA                                                   |

|     |               |                                                                                               |
|-----|---------------|-----------------------------------------------------------------------------------------------|
|     | F             | ATCAATCAAGAATAGGATATGCGACGAAGACGCTTCTGC                                                       |
| P36 | Donor-TKL1-R  | TTGTGCGCGTAAAAAACGGAACCAGAAGAAGCCAAAAAA<br>AAAAGAAATTCGGAATCTGTGTATATTACTGCATCTAGATA<br>TATGT |
| P37 | Donor-GRE3-F  | AAGACGATTGGGAAAATACTGTAATATAAATCGTAAAGGA<br>AAATTGGAAATTTTTTAAAGTCCAGCCAGTAAATCCATA           |
| P38 | Donor-GRE3-R  | AGCATCGGAATGAGGGAAATTTGTTTCATATCGTCGTTGAGT<br>ATGGATTTTACTGGCTGGACTTTAAAAAATTTCCAATTT         |
| P39 | Donor-PHO13-F | AGCCAAATCACAAAAAAGCCTTATAGCTTGCCCTGACAA<br>AGAATATACAACTCGGGAAAAGGAGCAATGCAAAATCTAG           |
| P40 | Donor-PHO13-R | AAACCTGAATATTTTTCCTTTTCAAAAAGTAATTCTACCCC<br>TAGATTTTGCATTGCTCCTTTTCCCGAGTTGTATATTCT          |
| P41 | Goden-XI-3-F  | AAAGGTCTCTGATCCCCAACCGGCTGCTTTCATGGTTTTAG<br>AGCTAGAAATAGCAAGTTAAAATAAGGCT                    |
| P42 | Goden-XI-3-R  | AAAGGTCTCTAAACCCACATGAAAGCAGCCGGTTGATCAT<br>TTATCTTTCCTGCGGAGAAGT                             |
| P43 | Goden-GRE3-F  | AAAGGTCTCTGATCCCAGGATTCTATACGGGCGCGTTTTAG<br>AGCTAGAAATAGCAAGTTAAAATAAGGCTAGTCC               |
| P44 | Goden-GRE3-R  | AAAGGTCTCTAAACCGGGCTTGATTCTACAACCAGATCAT<br>TTATCTTTCCTGCGGAGAAGTTT                           |
| P45 | Goden-PHO13-F | AAAGGTCTCTGATCATGGGGTACGAATCTCTAGGGTTTTAG<br>AGCTAGAAATAGCAAGTTAAAATAAGGCT                    |
| P46 | Goden-PHO13-R | AAAGGTCTCTAAACGCAGTGTAACAGCCAAACGGGATCAT<br>TTATCTTTCCTGCGGAGAAGT                             |
| P47 | Cas9-I-F      | CGATTTTTGTGATGCTCGTCAGGG                                                                      |
| P48 | Cas9-I-R      | AAAAAGAAGAGAAAGGTCTGACTCGAG                                                                   |

Table S3. Plasmid and gRNA involved in this study.

| <b>Name</b>      | <b>Relevant properties or genotype</b>                                                                                                                                    | <b>Source</b>           |
|------------------|---------------------------------------------------------------------------------------------------------------------------------------------------------------------------|-------------------------|
| pRS425           | ori, AmpR, 2 $\mu$ , LEU2, lacZ                                                                                                                                           | Laboratory preservation |
| pRS416           | ori, AmpR, CEN/ARS, URA3, lacZ                                                                                                                                            | Laboratory preservation |
| pRS01            | pRS425 carrying <i>XYL1</i> , <i>mXYL1</i> , <i>XYL2</i> , <i>XKS1</i>                                                                                                    | [1]                     |
| pRS02            | pRS416 carrying <i>RPE1</i> , <i>TAL1</i> , <i>RKII</i> and <i>TKL1</i>                                                                                                   | This work               |
| pLacZ-Sall(Cas9) | 2 $\mu$ , AmpR, TEF1p- <i>iCas9</i> -SNR52p                                                                                                                               | Laboratory preservation |
| pLacZ-XI-3       | ori, AmpR, 2 $\mu$ , G418, pTEF1- <i>iCas9</i> -tADH1, pSNR52-(XI-3 gRNA)-gRNA scaffold-tSNR52<br><b>20bp Target Sequence:</b> CCCAACCGGCTGCTTTCATG, AACCGGCTGCTTTCATGTGG | This work               |
| pLacZ-GRE3       | ori, AmpR, 2 $\mu$ , G418, pTEF1- <i>iCas9</i> -tADH1, pSNR52-(GRE3 gRNA)-gRNA scaffold-tSNR52<br><b>20bp Target Sequence:</b> CCAGGATTCTATACGGGCGC, TGGTTGTAGAATCAAGCCCG | This work               |
| pLacZ-PHO3       | ori, AmpR, 2 $\mu$ , G418, pTEF1- <i>iCas9</i> -tADH1, pSNR52-(PHO13 gRNA)-gRNA scaffold-tSNR52<br><b>20bp Target Sequence:</b> ATGGGGTACGAATCTCTAGG, CCGTTTGGCTGTTACTGTC | This work               |

Table S4. Key parameters of batch ethanol fermentation by different strains using the synthetic medium containing inhibitors.

| <i>S. cerevisiae</i><br>M3013      | Organic acids   |                 |                 |                   | Furan derivatives |                 |                    | Phenolic compounds |                        |                         |                 |                 |                 |                 |                 |
|------------------------------------|-----------------|-----------------|-----------------|-------------------|-------------------|-----------------|--------------------|--------------------|------------------------|-------------------------|-----------------|-----------------|-----------------|-----------------|-----------------|
|                                    | None            | Formate         | Acetate         | Lactate           | Furfural          | 5-HMF           | Phenol             | Benzoic acid       | 4-Hydroxy benzoic acid | <i>p</i> -Coumaric acid | Vanillin        | Vanillic acid   | Ferulic acid    | Syringic acid   | Syringaldehyde  |
| <b>Concentration (g/L)</b>         | /               | 5               | 8               | 5                 | 0.5               | 0.5             | 0.1                | 0.1                | 0.1                    | 0.04                    | 0.04            | 0.04            | 0.04            | 0.04            | 0.04            |
| <b>OD<sub>600max</sub></b>         | 13.31±<br>0.56  | 10.46±<br>0.16  | 9.16±<br>0.51   | 12.42±<br>0.25    | 11.72±<br>0.73    | 12.12±<br>0.47  | 11.81±<br>0.28     | 7.47±<br>0.33      | 10.77±<br>0.31         | 10.66±<br>0.28          | 10.83±<br>0.19  | 10.50±<br>0.37  | 11.10±<br>0.34  | 10.93±<br>0.15  | 10.68±<br>0.16  |
| <b>Ethanol concentration (g/L)</b> | 21.47±<br>0.84  | 20.38±<br>0.18  | 19.25±<br>0.68  | 20.98±<br>0.77    | 20.43±<br>0.42    | 19.69±<br>1.02  | 19.83±<br>0.66     | 19.01±<br>0.38     | 17.70±<br>0.60         | 16.02±<br>0.50          | 18.42±<br>0.05  | 16.52±<br>0.10  | 15.44±<br>0.21  | 16.08±<br>1.20  | 17.01±<br>0.43  |
| <b>Ethanol yield (g/g)</b>         | 0.472±<br>0.185 | 0.447±<br>0.096 | 0.409±<br>0.111 | 0.446±<br>0.108   | 0.435±<br>0.068   | 0.418±<br>0.135 | 0.436±<br>0.015    | 0.418±<br>0.026    | 0.389±<br>0.013        | 0.352±<br>0.011         | 0.405±<br>0.001 | 0.363±<br>0.002 | 0.339±<br>0.005 | 0.353±<br>0.026 | 0.374±<br>0.009 |
| <i>S. cerevisiae</i><br>YL13-1     | Organic acids   |                 |                 |                   | Furan derivatives |                 |                    | Phenolic compounds |                        |                         |                 |                 |                 |                 |                 |
|                                    | None            | Formate         | Acetate         | Lactate           | Furfural          | 5-HMF           | Phenol             | Benzoic acid       | 4-Hydroxy benzoic acid | <i>p</i> -Coumaric acid | Vanillin        | Vanillic acid   | Ferulic acid    | Syringic acid   | Syringaldehyde  |
| <b>Concentration (g/L)</b>         | /               | 5               | 8               | 5                 | 0.5               | 0.5             | 0.1                | 0.1                | 0.1                    | 0.04                    | 0.04            | 0.04            | 0.04            | 0.04            | 0.04            |
| <b>OD<sub>600max</sub></b>         | 13.46±<br>0.23  | 11.07±<br>0.16  | 11.07±<br>0.50  | 12.45±<br>0.51    | 12.05±<br>0.44    | 12.02±<br>0.23  | 11.98±<br>0.77     | 11.57±<br>0.63     | 11.55±<br>1.21         | 11.14±<br>1.14          | 11.95±<br>0.19  | 11.92±<br>0.32  | 11.54±<br>0.73  | 12.05±<br>0.18  | 12.35±<br>0.21  |
| <b>Ethanol concentration (g/L)</b> | 22.91±<br>1.23  | 20.28±<br>1.02  | 21.73±<br>0.18  | 22.09±<br>0.63    | 21.46±<br>0.98    | 21.51±<br>1.72  | 21.70±<br>0.70     | 20.84±<br>0.80     | 21.06±<br>0.15         | 20.89±<br>0.95          | 20.15±<br>0.79  | 20.14±<br>0.01  | 21.39±<br>0.40  | 21.85±<br>0.28  | 21.76±<br>1.13  |
| <b>Ethanol yield (g/g)</b>         | 0.451±<br>0.024 | 0.399±<br>0.020 | 0.427±<br>0.004 | 0.434±<br>0.014   | 0.422±<br>0.019   | 0.423±<br>0.034 | 0.427±<br>0.027    | 0.410±<br>0.016    | 0.414±<br>0.003        | 0.411±<br>0.0190        | 0.396±<br>0.015 | 0.386±<br>0.000 | 0.421±<br>0.008 | 0.445±<br>0.013 | 0.428±<br>0.022 |
| Organic acids                      |                 |                 |                 | Furan derivatives |                   |                 | Phenolic compounds |                    |                        |                         |                 |                 |                 |                 |                 |

| <i>S. cerevisiae</i><br>YL13-2             | None            | Formate         | Acetate         | Lactate         | Furfural        | 5-HMF           | Phenol          | Benzoic<br>acid | 4-<br>Hydroxy<br>benzoic<br>acid | <i>p</i> -<br>Coumari<br>c acid | Vanillin        | Vanillic<br>acid | Ferulic<br>acid | Syringic<br>acid | Syringal<br>dehyde |
|--------------------------------------------|-----------------|-----------------|-----------------|-----------------|-----------------|-----------------|-----------------|-----------------|----------------------------------|---------------------------------|-----------------|------------------|-----------------|------------------|--------------------|
| <b>Concentration<br/>(g/L)</b>             | /               | 5               | 8               | 5               | 0.5             | 0.5             | 0.1             | 0.1             | 0.1                              | 0.04                            | 0.04            | 0.04             | 0.04            | 0.04             | 0.04               |
| <b>OD<sub>600max</sub></b>                 | 14.02±<br>0.45  | 12.37±<br>0.61  | 12.52±<br>0.40  | 13.33±<br>0.73  | 13.27±<br>0.27  | 13.98±<br>1.02  | 12.99±<br>0.72  | 12.66±<br>0.39  | 12.22±<br>0.57                   | 12.54±<br>0.12                  | 12.87±<br>0.75  | 12.87±<br>0.75   | 13.48±<br>0.35  | 13.84±<br>0.14   | 13.73±<br>0.66     |
| <b>Ethanol<br/>concentration<br/>(g/L)</b> | 23.24±<br>0.73  | 21.49±<br>0.87  | 22.65±<br>0.18  | 23.66±<br>0.65  | 22.87±<br>0.22  | 23.07±<br>0.18  | 22.49±<br>0.22  | 22.18±<br>0.79  | 22.77±<br>0.62                   | 21.98±<br>0.55                  | 21.69±<br>0.55  | 21.02±<br>0.43   | 22.18±<br>0.19  | 22.62±<br>0.65   | 22.31±<br>0.49     |
| <b>Ethanol yield<br/>(g/g)</b>             | 0.457±<br>0.014 | 0.423±<br>0.017 | 0.446±<br>0.004 | 0.465±<br>0.013 | 0.450±<br>0.004 | 0.454±<br>0.004 | 0.442±<br>0.024 | 0.436±<br>0.015 | 0.448±<br>0.012                  | 0.432±<br>0.011                 | 0.427±<br>0.011 | 0.413±<br>0.008  | 0.436±<br>0.004 | 0.430±<br>0.005  | 0.439±<br>0.010    |

Ethanol yield = maximum ethanol concentration in batch fermentation / the consumed sugars × 100%

Table S5. Ethanol fermentation performances by strains YL13-2 using undetoxified SECSH without adding YP and with adding YP.

|                              | Without adding YP | With adding YP |
|------------------------------|-------------------|----------------|
| Ethanol concentration (g/L)  | 20.04±0.19        | 20.39±0.14     |
| Ethanol yield (g/g)          | 0.438±0.004       | 0.445±0.003    |
| Ethanol yield (%)            | 85.60±0.80        | 87.11±0.58     |
| Ethanol productivity (g/L h) | 0.56±0.01         | 0.57±0.01      |

Table S6. Ethanol fermentation performances by different strains using undetoxified SECSH.

| Strain                       | M3013       | YL13-1      | YL13-2      |
|------------------------------|-------------|-------------|-------------|
| Residual sugar (g/L)         | 10.08±0.79  | 3.53±0.59   | 0±0.00      |
| Ethanol concentration (g/L)  | 20.62±1.07  | 22.43±0.79  | 22.96±1.73  |
| Ethanol yield (g/g)          | 0.415±0.022 | 0.442±0.016 | 0.454±0.034 |
| Ethanol yield (%)            | 81.22±4.23  | 86.52±3.12  | 88.88±6.82  |
| Ethanol productivity (g/L h) | 0.57±0.03   | 0.61±0.02   | 0.63±0.05   |

### **Additional references**

[1] Y.J. Li, M.M. Wang, Y.W. Chen, M. Wang, L.H. Fan, T.W. Tan, Engineered yeast with a CO<sub>2</sub>-fixation pathway to improve the bio-ethanol production from xylose-mixed sugars, Sci Rep 7 (2017) 43875. <https://doi.org/10.1038/srep43875>.
